# Supplementary material for: Trace Element Patterns in Shells of Mussels (Bivalvia) Allow to Distinguish between Fresh- and Brackish-Water Coastal Environments of the Subarctic and Boreal Zone
Source: MDPI journal article supplement (doi:10.3390/w15203625), 2023-10-16
Supplement: s1 [file s1]

**Supplementary Materials for**

**Trace Element Patterns in Shells of Mussels (Bivalvia)**

**Allow to Distinguish between Fresh- and Brackish-Water**

**Coastal Environments**

**Artem A. Lyubas, Irina A. Kuznetsova, Galina V. Bovykina, Tatyana A. Eliseeva,**  
**Mikhail Yu. Gofarov, Irina S. Khrebtova, Alexander V. Kondakov, Alexey V. Malkov,**  
**Vasileios Mavromatis, Alexander R. Shevchenko,**  
**Alena A. Soboleva, Oleg S. Pokrovsky and Ivan N. Bolotov**

Table S1. Elemental composition of freshwater bivalve shells (ppm, dry weight).

| Element | Detection Limit | Severnaya Dvina River   |        |                 |        | Onega River             |        |                 |        |        |        | Khalaktyrskoe Lake           |        |        |        |        |
|---------|-----------------|-------------------------|--------|-----------------|--------|-------------------------|--------|-----------------|--------|--------|--------|------------------------------|--------|--------|--------|--------|
|         |                 | <i>Anodonta anatina</i> |        | <i>Unio</i> sp. |        | <i>Anodonta anatina</i> |        | <i>Unio</i> sp. |        |        |        | <i>Beringiana beringiana</i> |        |        |        |        |
|         |                 | 1                       | 2      | 1               | 2      | 1                       | 2      | 3               | 1      | 2      | 3      | 1                            | 2      | 3      | 4      | 5      |
| Li      | 0.026           | 0.38                    | 0.11   | 0.16            | 0.14   | 0.43                    | 0.49   | 0.17            | 0.49   | 0.25   | 0.3    | n.d                          | n.d    | n.d    | n.d    | n.d    |
| Na      | 11.2            | 2415                    | 2670   | 2319            | 2471   | 2408                    | 2246   | 2472            | 1938   | 1999   | 2080   | 2242                         | 2037   | 2061   | 2238   | 2128   |
| Mg      | 13.7            | 173                     | 54.7   | 81              | 75.4   | 181                     | 228    | 73.2            | 120    | 74.2   | 60.4   | 59.1                         | 94.6   | 90.6   | 124    | 59.5   |
| Al      | 7.93            | 580                     | 157    | 130             | 148    | 518                     | 651    | 116             | 385    | 190    | 148    | 58.3                         | 119    | 109    | 215    | 105    |
| P       | 20.7            | 323                     | 81.9   | 321             | 81.6   | 71.8                    | 90.6   | 54.1            | 124    | 126    | 76.3   | 126                          | 133    | 135    | 251    | 106    |
| S       | 26.7            | 465                     | 198    | 278             | 176    | 171                     | 341    | 159             | 257    | 249    | 187    | 551                          | 446    | 526    | 547    | 318    |
| K       | 20.3            | 246                     | 51.8   | 55.4            | 58.4   | 184                     | 219    | 42.2            | 126    | 56.2   | 52.8   | n.d                          | n.d    | n.d    | 22.1   | n.d    |
| Ca      | 65.7            | 392339                  | 404725 | 385543          | 365543 | 392606                  | 390740 | 399191          | 381631 | 385911 | 384704 | 421883                       | 383635 | 385419 | 401699 | 394563 |
| Ti      | 3.34            | 56.6                    | 29.9   | 17.4            | 18.4   | 41.1                    | 45.1   | 9.6             | 24     | 13.3   | 11.5   | 7.7                          | 17.9   | 15.1   | 21     | 11.3   |
| Mn      | 0.612           | 673                     | 515    | 337             | 317    | 412                     | 433    | 325             | 649    | 398    | 330    | 751                          | 618    | 442    | 890    | 722    |
| Fe      | 9.36            | 3088                    | 469    | 2413            | 521    | 536                     | 840    | 296             | 1725   | 1422   | 245    | 534                          | 537    | 525    | 1396   | 284    |
| Cu      | 0.717           | 3.2                     | 2.6    | 2.2             | 1.9    | 3.3                     | 4.2    | 3.1             | 4.5    | 3.8    | 2.2    | 8.5                          | 9.2    | 8.8    | 10.5   | 9.1    |
| Zn      | 1.28            | 4.5                     | 0.25   | 4.5             | 2.7    | 6.5                     | 12.1   | 11.4            | 12.3   | 10.7   | 8      | 7.5                          | 7.8    | 9.5    | 9.1    | 5.7    |
| Sr      | 0.048           | 815                     | 734    | 720             | 622    | 363                     | 376    | 370             | 436    | 388    | 374    | 287                          | 254    | 256    | 284    | 236    |
| Zr      | 0.024           | 2.5                     | 1.13   | 0.65            | 0.43   | 2.17                    | 2.83   | 0.74            | 1.3    | 0.97   | 0.96   | 0.51                         | 0.6    | 0.61   | 0.68   | 0.57   |
| Ba      | 0.070           | 69.4                    | 39.5   | 51.3            | 24.8   | 27.1                    | 31.6   | 25.5            | 35.3   | 28.2   | 21.7   | 14.8                         | 14.7   | 12.1   | 21.2   | 14.4   |
| La      | 0.012           | 1.1                     | 0.25   | 0.6             | 0.25   | 0.39                    | 0.38   | 0.1             | 0.49   | 0.29   | 0.11   | n.d                          | 0.026  | 0.026  | 0.032  | 0.019  |
| Ce      | 0.021           | 2.3                     | 0.5    | 1.1             | 0.4    | 0.74                    | 0.8    | 0.2             | 1.1    | 0.67   | 0.17   | n.d                          | 0.03   | 0.03   | 0.063  | n.d    |
| Pr      | 0.004           | 0.26                    | 0.08   | 0.12            | 0.07   | 0.1                     | 0.09   | 0.02            | 0.11   | 0.08   | 0.03   | 0.005                        | 0.006  | 0.008  | 0.009  | n.d    |
| Nd      | 0.009           | 1                       | 0.23   | 0.47            | 0.18   | 0.34                    | 0.35   | 0.08            | 0.44   | 0.28   | 0.08   | 0.018                        | 0.032  | 0.037  | 0.06   | 0.025  |
| Gd      | 0.006           | 0.17                    | 0.04   | 0.1             | 0.03   | 0.06                    | 0.06   | 0.01            | 0.07   | 0.04   | 0.02   | 0.008                        | 0.017  | 0.01   | 0.02   | 0.011  |
| Pb      | 0.064           | 0.64                    | 0.43   | 0.45            | 0.35   | 0.23                    | 0.4    | 0.13            | 0.87   | 0.65   | 0.13   | 0.14                         | 0.23   | 0.2    | 0.27   | 0.16   |
| U       | 0.005           | 0.053                   | 0.017  | 0.017           | 0.009  | 0.02                    | 0.03   | n.d             | 0.027  | 0.019  | 0.007  | n.d                          | n.d    | n.d    | n.d    | n.d    |

n.d.—not determined.

Table S2. Elemental composition of marine bivalve shells (ppm, dry weight)

| Element | Detection Limit | Onega Bay             |        |        |        |        | Dvina Bay             |        |        |        | Avacha Bay               |        |        |        |        |
|---------|-----------------|-----------------------|--------|--------|--------|--------|-----------------------|--------|--------|--------|--------------------------|--------|--------|--------|--------|
|         |                 | <i>Mytilus edulis</i> |        |        |        |        | <i>Mytilus edulis</i> |        |        |        | <i>Mytilus trossulus</i> |        |        |        |        |
|         |                 | 1                     | 2      | 3      | 4      | 5      | 1                     | 2      | 3      | 4      | 1                        | 2      | 3      | 4      | 5      |
| Li      | 0.026           | 0.34                  | 0.59   | 0.34   | 0.35   | 0.44   | 0.39                  | 0.39   | 0.33   | 0.41   | 0.79                     | 0.91   | 1.1    | 0.81   | 0.9    |
| Na      | 11.2            | 3862                  | 3227   | 2412   | 2927   | 3097   | 3510                  | 3961   | 3082   | 3259   | 3568                     | 3257   | 3660   | 3369   | 3755   |
| Mg      | 13.7            | 1057                  | 1342   | 1106   | 1499   | 1050   | 972                   | 1178   | 872    | 1068   | 665                      | 718    | 712    | 667    | 735    |
| Al      | 7.93            | 37.4                  | 65.9   | 11.4   | 45.4   | 21.6   | 60                    | 29.8   | 31.2   | 16.8   | n.d                      | n.d    | n.d    | n.d    | n.d    |
| P       | 20.7            | 129                   | 156    | 152    | 155    | 174    | 184                   | 161    | 143    | 130    | 148                      | 161    | 153    | 153    | 220    |
| S       | 26.7            | 1128                  | 652    | 991    | 915    | 775    | 783                   | 649    | 752    | 766    | 1038                     | 1010   | 810    | 1248   | 945    |
| K       | 20.3            | 41                    | 46.1   | n.d    | 42.9   | 40.3   | 63.5                  | 29.3   | 24.2   | n.d    | 25.6                     | n.d    | n.d    | 22.3   | 27.3   |
| Ca      | 65.7            | 436825                | 426232 | 421214 | 420768 | 410286 | 426901                | 416084 | 384750 | 398019 | 381521                   | 361767 | 382948 | 374607 | 426009 |
| Ti      | 3.34            | n.d                   | 6.2    | n.d    | 3.7    | n.d    | 4.6                   | n.d    | n.d    | n.d    | n.d                      | n.d    | n.d    | n.d    | n.d    |
| Mn      | 0.612           | 52.6                  | 14.8   | 35     | 83.9   | 22.3   | 190                   | 59.5   | 339    | 25.7   | 9.3                      | 13.8   | 15.9   | 9.4    | 12.7   |
| Fe      | 9.36            | 84.4                  | 62.6   | 77.6   | 251    | 48.6   | 576                   | 286    | 386    | 98.1   | 67.3                     | 48.9   | 46.2   | 74.4   | 20.6   |
| Cu      | 0.717           | n.d                   | 1.33   | 1.13   | n.d    | 1.41   | 1.45                  | 1.11   | 0.94   | n.d    | 1.9                      | 2.2    | 2.6    | 1.9    | 1.11   |
| Zn      | 1.28            | 13.9                  | 12     | 12.7   | 22.8   | 18.9   | 20.5                  | 20.6   | 16.5   | 11.6   | 14.5                     | 9.8    | 17.1   | 16.9   | 11.8   |
| Sr      | 0.048           | 1331                  | 1369   | 1294   | 1295   | 1389   | 1643                  | 1540   | 1683   | 1535   | 1298                     | 1183   | 1099   | 1210   | 1270   |
| Zr      | 0.024           | n.d                   | 0.65   | 0.41   | 0.47   | 0.45   | 0.61                  | 0.47   | 0.59   | n.d    | 0.57                     | 0.55   | 0.01   | 0.58   | n.d    |
| Ba      | 0.070           | 5.1                   | 4.5    | 3.2    | 4.5    | 4.8    | 13.3                  | 10.2   | 14.4   | 10.7   | 2.9                      | 3      | 2.3    | 2.4    | 2.8    |
| La      | 0.012           | 0.59                  | 0.38   | 0.3    | 0.3    | 0.3    | 0.15                  | 0.09   | 0.13   | 0.078  | 0.038                    | 0.032  | 0.023  | 0.033  | 0.026  |
| Ce      | 0.021           | 0.57                  | 0.38   | 0.33   | 0.35   | 0.34   | 0.22                  | 0.101  | 0.22   | 0.063  | n.d                      | n.d    | n.d    | n.d    | n.d    |
| Pr      | 0.004           | 0.008                 | 0.01   | 0.012  | 0.018  | 0.006  | 0.034                 | 0.011  | 0.031  | 0.012  | 0.006                    | 0.002  | 0.014  | 0.002  | 0.022  |
| Nd      | 0.009           | 0.048                 | 0.062  | 0.051  | 0.068  | 0.038  | 0.1                   | 0.056  | 0.105  | 0.039  | 0.021                    | 0.014  | n.d    | 0.019  | n.d    |
| Gd      | 0.006           | 0.007                 | 0.01   | 0.011  | 0.013  | 0.01   | 0.02                  | 0.016  | 0.023  | 0.014  | 0.009                    | n.d    | n.d    | 0.007  | n.d    |
| Pb      | 0.064           | 0.095                 | 0.13   | 0.096  | 0.11   | 0.17   | 0.14                  | 0.11   | 0.11   | 0.09   | 0.14                     | 0.14   | 0.17   | 0.19   | 0.18   |
| U       | 0.005           | 0.015                 | 0.011  | 0.02   | 0.012  | n.d    | 0.01                  | n.d    | 0.018  | n.d    | 0.031                    | 0.044  | 0.008  | 0.071  | 0.024  |

n.d.—not determined.

Table S3. Elemental composition water and bottom sediments.

| Element | Detection Limit | Bottom Sediments, ppm |           |            |                       |             |                     | Element | Detection limit | Fresh Water, ppb      |             |                     | Element | Detection Limit | Marine Water, ppb |           |            |
|---------|-----------------|-----------------------|-----------|------------|-----------------------|-------------|---------------------|---------|-----------------|-----------------------|-------------|---------------------|---------|-----------------|-------------------|-----------|------------|
|         |                 | Dvina Bay             | Onega Bay | Avacha Bay | Severnaya Dvina River | Onega River | Khalaktyrskoye Lake |         |                 | Severnaya Dvina River | Onega River | Khalaktyrskoye Lake |         |                 | Dvina Bay         | Onega Bay | Avacha Bay |
| Na      | 52              | 7402                  | 21369     | 30670      | 6505                  | 16147       | 23349               | Na      | 10              | 9567                  | 4617        | 12640               | Na      | 149             | 4785387           | 5476652   | 8815829    |
| Mg      | 42              | 1715                  | 3090      | 23842      | 1636                  | 11035       | 26640               | Mg      | 6.86            | 9977                  | 11763       | 6122                | Mg      | 274             | 572375            | 632628    | 1012034    |
| Al      | 42              | 19116                 | 44734     | 91139      | 21052                 | 48106       | 88014               | Al      | 0.82            | 155                   | 15.0        | 11.7                | Al      | 35.3            | 74.9              | 139       | 17.7       |
| P       | 13              | 131                   | 216       | 995        | 114                   | 457         | 709                 | P       | 12.7            | 39.3                  | 6.3         | 22.4                | P       | 529             | n.d.              | n.d.      | n.d.       |
| S       | 10              | 403                   | 132       | 475        | 63                    | 466         | 611                 | S       | 13.4            | 17766                 | 9470        | 2914                | S       | 534             | 381696            | 457269    | 740505     |
| K       | 25              | 8116                  | 13981     | 9286       | 8893                  | 16112       | 5234                | K       | 10              | 1064                  | 693         | 2050                | K       | 160             | 162874            | 183643    | 310544     |
| Ca      | 43              | 4561                  | 10966     | 50006      | 4436                  | 19987       | 58978               | Ca      | 10              | 47842                 | 38255       | 17303               | Ca      | 203             | 187318            | 217142    | 342192     |
| Ti      | 1.8             | 983                   | 746       | 4475       | 790                   | 2002        | 5076                | Ti      | 0.51            | n.d.                  | n.d.        | n.d.                | Ti      | 20.3            | n.d.              | n.d.      | n.d.       |
| Mn      | 4.7             | 135                   | 150       | 1067       | 127                   | 307         | 1260                | Mn      | 0.1             | 168                   | 6.9         | 1.8                 | Mn      | 2.5             | 104               | 37.8      | 3.2        |
| Fe      | 35              | 5756                  | 7583      | 55368      | 5800                  | 19207       | 59763               | Fe      | 5.44            | 592                   | 56.2        | 78.0                | Fe      | 218             | n.d.              | n.d.      | n.d.       |
| Li      | 0.043           | 4.1                   | 4.6       | 11         | 5.6                   | 13          | 9.3                 | Li      | 0.007           | 3.9                   | 6.6         | 0.9                 | Li      | 0.27            | 84.4              | 96.2      | 159        |
| Be      | 0.031           | 0.36                  | 0.82      | 0.76       | 0.51                  | 0.99        | 0.60                | Be      | 0.007           | n.d.                  | n.d.        | n.d.                | Be      | 0.3             | n.d.              | n.d.      | n.d.       |
| Sc      | 0.058           | 2.3                   | 3.2       | 21.2       | 1.8                   | 6.9         | 34.4                | Sc      | 0.1             | n.d.                  | n.d.        | n.d.                | Sc      | 3.05            | n.d.              | n.d.      | n.d.       |
| V       | 0.75            | 0.4                   | 8.9       | 170        | 11.9                  | 40.2        | 225                 | V       | 0.11            | 1.3                   | 0.52        | 1.57                | V       | 4.59            | n.d.              | n.d.      | n.d.       |
| Cr      | 0.68            | 16.6                  | 37.1      | 41.1       | 15                    | 47.5        | 59.9                | Cr      | 0.62            | n.d.                  | n.d.        | n.d.                | Cr      | 24.7            | n.d.              | n.d.      | n.d.       |
| Co      | 0.21            | 2.5                   | 3.3       | 14.9       | 2.6                   | 8.0         | 26.1                | Co      | 0.12            | n.d.                  | n.d.        | n.d.                | Co      | 4.71            | n.d.              | n.d.      | n.d.       |
| Ni      | 0.75            | 4.6                   | 8.3       | 18.4       | 7.7                   | 17.9        | 23.0                | Ni      | 0.5             | n.d.                  | n.d.        | n.d.                | Ni      | 8.58            | n.d.              | n.d.      | n.d.       |
| Cu      | 0.8             | 3.0                   | 1.7       | 64.8       | 2.37                  | 8.5         | 55.8                | Cu      | 0.5             | n.d.                  | n.d.        | n.d.                | Cu      | 10.3            | n.d.              | n.d.      | n.d.       |
| Zn      | 0.78            | 13.0                  | 13.8      | 113        | 18                    | 51.3        | 150                 | Zn      | 0.5             | 3.1                   | 2.4         | 0.96                | Zn      | 11.4            | n.d.              | n.d.      | n.d.       |
| Ga      | 0.024           | 3.5                   | 8.3       | 14.9       | 4.2                   | 9.0         | 18.0                | Ga      | 0.04            | n.d.                  | n.d.        | n.d.                | Ga      | 1.58            | n.d.              | n.d.      | n.d.       |
| As      | 0.064           | 0.71                  | 0.032     | 4.60       | 1.21                  | 0.82        | 2.31                | As      | 0.1             | 1.5                   | 0.56        | 0.40                | As      | 2.23            | n.d.              | n.d.      | n.d.       |
| Rb      | 0.043           | 22.2                  | 38.5      | 15.8       | 26.8                  | 53.3        | 11.0                | Rb      | 0.02            | 1.3                   | 1.0         | 2.0                 | Rb      | 0.23            | 55.3              | 63.5      | 102        |
| Sr      | 0.048           | 106                   | 214       | 371        | 104                   | 177         | 357                 | Sr      | 0.1             | 549                   | 205         | 66                  | Sr      | 1.22            | 3538              | 4104      | 6879       |
| Y       | 0.049           | 4.5                   | 6.4       | 19.5       | 4.6                   | 11.0        | 19.1                | Y       | 0.005           | 0.42                  | 0.030       | 0.007               | Y       | 0.1             | n.d.              | n.d.      | n.d.       |
| Zr      | 0.024           | 32.6                  | 60.1      | 81.6       | 27.4                  | 114.9       | 78.1                | Zr      | 0.007           | 0.29                  | 0.093       | 0.015               | Zr      | 0.3             | n.d.              | n.d.      | n.d.       |
| Nb      | 0.016           | 3.5                   | 3.1       | 2.2        | 2.5                   | 6.6         | 1.6                 | Nb      | 0.005           | n.d.                  | n.d.        | n.d.                | Nb      | 0.21            | n.d.              | n.d.      | n.d.       |
| Mo      | 0.058           | 0.09                  | 0.12      | 0.77       | 0.14                  | 0.24        | 0.87                | Mo      | 0.02            | 0.53                  | 0.25        | 0.31                | Mo      | 0.4             | 4.5               | 6.3       | 11.2       |
| Ag      | 0.027           | 0.013                 | 0.013     | 0.047      | 0.049                 | 0.062       | 0.105               | Ag      | 0.005           | n.d.                  | n.d.        | n.d.                | Ag      | 0.11            | n.d.              | n.d.      | n.d.       |
| Sn      | 0.074           | 0.12                  | 0.33      | 0.75       | 0.15                  | 0.59        | 0.91                | Sn      | 0.02            | n.d.                  | n.d.        | n.d.                | Sn      | 0.33            | n.d.              | n.d.      | n.d.       |
| Sb      | 0.033           | 0.13                  | 0.06      | 0.45       | 0.14                  | 0.22        | 0.44                | Sb      | 0.006           | 0.038                 | 0.038       | 0.104               | Sb      | 0.25            | n.d.              | n.d.      | n.d.       |
| Cs      | 0.012           | 0.27                  | 0.29      | 0.66       | 0.43                  | 1.0         | 0.54                | Cs      | 0.001           | 0.009                 | 0.001       | 0.011               | Cs      | 0.02            | 0.12              | 0.14      | 0.25       |
| Ba      | 0.07            | 273                   | 489       | 406        | 334                   | 417         | 250                 | Ba      | 0.1             | 49.9                  | 22.6        | 6.2                 | Ba      | 0.76            | n.d.              | n.d.      | n.d.       |
| La      | 0.012           | 4.6                   | 4.04      | 6.80       | 6.10                  | 12.2        | 4.43                | La      | 0.001           | 0.65                  | 0.027       | 0.002               | La      | 0.05            | n.d.              | n.d.      | n.d.       |
| Ce      | 0.02            | 10.1                  | 8.2       | 15.5       | 12.1                  | 26.6        | 11.1                | Ce      | 0.001           | 1.5                   | 0.049       | 0.004               | Ce      | 0.05            | n.d.              | n.d.      | n.d.       |
| Pr      | 0.004           | 1.2                   | 1.0       | 2.2        | 1.39                  | 3.1         | 1.7                 | Pr      | 0.001           | 0.17                  | 0.008       | 0.001               | Pr      | 0.009           | n.d.              | n.d.      | n.d.       |
| Nd      | 0.034           | 4.7                   | 4.2       | 10.6       | 5.29                  | 12.1        | 7.8                 | Nd      | 0.001           | 0.70                  | 0.034       | 0.004               | Nd      | 0.03            | n.d.              | n.d.      | n.d.       |
| Sm      | 0.008           | 0.93                  | 0.95      | 3.0        | 1.03                  | 2.5         | 2.4                 | Sm      | 0.001           | 0.14                  | 0.009       | 0.001               | Sm      | 0.02            | n.d.              | n.d.      | n.d.       |
| Eu      | 0.007           | 0.26                  | 0.30      | 0.93       | 0.29                  | 0.58        | 0.92                | Eu      | 0.001           | n.d.                  | n.d.        | n.d.                | Eu      | 0.02            | n.d.              | n.d.      | n.d.       |
| Gd      | 0.003           | 0.764                 | 0.875     | 2.9        | 0.939                 | 2.1         | 2.8                 | Gd      | 0.001           | 0.13                  | 0.006       | 0.003               | Gd      | 0.03            | n.d.              | n.d.      | n.d.       |

|    |       |       |       |       |       |       |       |    |       |        |        |        |    |       |       |       |       |
|----|-------|-------|-------|-------|-------|-------|-------|----|-------|--------|--------|--------|----|-------|-------|-------|-------|
| Tb | 0.007 | 0.12  | 0.16  | 0.52  | 0.12  | 0.34  | 0.50  | Tb | 0.001 | n.d.   | n.d.   | n.d.   | Tb | 0.008 | n.d.  | n.d.  | n.d.  |
| Dy | 0.007 | 0.66  | 0.98  | 2.97  | 0.80  | 1.81  | 2.90  | Dy | 0.001 | 0.089  | 0.004  | 0.001  | Dy | 0.01  | n.d.  | n.d.  | n.d.  |
| Ho | 0.007 | 0.13  | 0.20  | 0.61  | 0.15  | 0.37  | 0.63  | Ho | 0.001 | n.d.   | n.d.   | n.d.   | Ho | 0.008 | n.d.  | n.d.  | n.d.  |
| Er | 0.004 | 0.41  | 0.64  | 1.8   | 0.39  | 1.1   | 2.0   | Er | 0.001 | 0.042  | 0.003  | 0.002  | Er | 0.008 | n.d.  | n.d.  | n.d.  |
| Tm | 0.005 | 0.061 | 0.099 | 0.27  | 0.061 | 0.16  | 0.28  | Tm | 0.001 | n.d.   | n.d.   | n.d.   | Tm | 0.007 | n.d.  | n.d.  | n.d.  |
| Yb | 0.008 | 0.50  | 0.77  | 2.1   | 0.45  | 1.2   | 2.2   | Yb | 0.001 | 0.032  | 0.003  | 0.003  | Yb | 0.02  | n.d.  | n.d.  | n.d.  |
| Lu | 0.004 | 0.068 | 0.10  | 0.28  | 0.064 | 0.16  | 0.30  | Lu | 0.001 | n.d.   | n.d.   | n.d.   | Lu | 0.01  | n.d.  | n.d.  | n.d.  |
| Hf | 0.013 | 0.73  | 1.5   | 2.1   | 0.64  | 2.6   | 1.9   | Hf | 0.001 | n.d.   | n.d.   | n.d.   | Hf | 0.05  | n.d.  | n.d.  | n.d.  |
| Ta | 0.011 | 0.15  | 0.15  | 0.15  | 0.16  | 0.36  | 0.16  | Ta | 0.003 | n.d.   | n.d.   | n.d.   | Ta | 0.11  | n.d.  | n.d.  | n.d.  |
| W  | 0.023 | 0.18  | 0.12  | 0.33  | 0.16  | 0.31  | 0.32  | W  | 0.003 | 0.008  | 0.021  | 0.023  | W  | 0.14  | n.d.  | n.d.  | n.d.  |
| Tl | 0.005 | 0.094 | 0.14  | 0.077 | 0.14  | 0.21  | 0.067 | Tl | 0.002 | 0.003  | 0.001  | 0.001  | Tl | 0.07  | n.d.  | n.d.  | n.d.  |
| Pb | 0.075 | 5.1   | 7.8   | 12.6  | 6.1   | 11.8  | 61.2  | Pb | 0.02  | 0.379  | 0.010  | 0.032  | Pb | 0.49  | n.d.  | n.d.  | n.d.  |
| Bi | 0.01  | 0.012 | 0.005 | 0.069 | 0.030 | 0.054 | 0.090 | Bi | 0.001 | n.d.   | n.d.   | n.d.   | Bi | 0.04  | n.d.  | n.d.  | n.d.  |
| Th | 0.007 | 0.65  | 0.64  | 1.2   | 1.0   | 3.0   | 0.72  | Th | 0.001 | 0.035  | 0.004  | 0.001  | Th | 0.02  | n.d.  | n.d.  | n.d.  |
| U  | 0.006 | 0.24  | 0.27  | 0.52  | 0.33  | 0.79  | 0.32  | U  | 0.001 | 0.407  | 0.355  | 0.029  | U  | 0.03  | 1.31  | 1.74  | 2.93  |
| B  | n.d.  | B  | 0.69  | 23.1   | 23.0   | 32.4   | B  | 30.6  | 2128  | 2502  | 4040  |
| Si | n.d.  | Si | 16.7  | 2094   | 1180   | 2439   | Si | 668   | n.d.  | n.d.  | n.d.  |
| Br | n.d.  | Br | 20    | 33.5   | 27.9   | 38.6   | Br | 371   | 31355 | 38049 | 63331 |
| Re | n.d.  | Re | 0.001 | 0.0009 | 0.0005 | 0.0013 | Re | 0.008 | n.d.  | n.d.  | n.d.  |

n.d.—not determined.

**Table S4.** Ca-normalized distribution coefficients between mussels' shells and water.

| Sample | Li     | Na     | Mg      | Al   | S       | K       | Mn    | Sr    | U      |
|--------|--------|--------|---------|------|---------|---------|-------|-------|--------|
| AHol1  | 0.0121 | 0.0308 | 0.00212 | 0.46 | 0.00319 | 0.02814 | 0.49  | 0.181 | 0.0160 |
| AHol2  | 0.0033 | 0.0330 | 0.00065 | 0.12 | 0.00132 | 0.00576 | 0.36  | 0.158 | 0.0049 |
| UHol1  | 0.0050 | 0.0301 | 0.00101 | 0.10 | 0.00194 | 0.00646 | 0.25  | 0.163 | 0.0051 |
| UHol2  | 0.0048 | 0.0338 | 0.00099 | 0.12 | 0.00129 | 0.00718 | 0.25  | 0.148 | 0.0030 |
| OAP 1  | 0.0063 | 0.0508 | 0.00150 | 3.36 | 0.00176 | 0.02593 | 5.81  | 0.172 | 0.0056 |
| OAP 2  | 0.0072 | 0.0476 | 0.00190 | 4.24 | 0.00352 | 0.03087 | 6.15  | 0.179 | 0.0082 |
| OAP 3  | 0.0025 | 0.0513 | 0.00060 | 0.74 | 0.00161 | 0.00583 | 4.51  | 0.173 | 0.0007 |
| OUP 1  | 0.0075 | 0.0421 | 0.00102 | 2.56 | 0.00272 | 0.01819 | 9.43  | 0.213 | 0.0077 |
| OUP 2  | 0.0038 | 0.0429 | 0.00063 | 1.25 | 0.00260 | 0.00803 | 5.71  | 0.187 | 0.0053 |
| OUP 3  | 0.0045 | 0.0448 | 0.00051 | 0.98 | 0.00197 | 0.00757 | 4.76  | 0.181 | 0.0020 |
| AVA 1  | 0.0045 | 0.0004 | 0.00059 | 0.20 | 0.00126 | 0.00007 | 2.56  | 0.169 | 0.0095 |
| AVA 2  | 0.0054 | 0.0003 | 0.00067 | 0.21 | 0.00129 | 0.00003 | 4.02  | 0.163 | 0.0143 |
| AVA 3  | 0.0062 | 0.0004 | 0.00063 | 0.20 | 0.00098 | 0.00003 | 4.37  | 0.143 | 0.0025 |
| AVA 4  | 0.0046 | 0.0003 | 0.00060 | 0.21 | 0.00154 | 0.00007 | 2.64  | 0.161 | 0.0221 |
| AVA 5  | 0.0045 | 0.0003 | 0.00058 | 0.18 | 0.00102 | 0.00007 | 3.15  | 0.148 | 0.0066 |
| O 1    | 0.0018 | 0.0004 | 0.00083 | 0.13 | 0.00123 | 0.00011 | 0.69  | 0.161 | 0.0043 |
| O 2    | 0.0031 | 0.0003 | 0.00108 | 0.24 | 0.00073 | 0.00013 | 0.20  | 0.170 | 0.0032 |
| O 3    | 0.0018 | 0.0002 | 0.00090 | 0.04 | 0.00112 | 0.00003 | 0.48  | 0.163 | 0.0060 |
| O 4    | 0.0019 | 0.0003 | 0.00122 | 0.17 | 0.00103 | 0.00012 | 1.15  | 0.163 | 0.0034 |
| O 5    | 0.0024 | 0.0003 | 0.00088 | 0.08 | 0.00090 | 0.00012 | 0.31  | 0.179 | 0.0008 |
| J 1    | 0.0020 | 0.0003 | 0.00074 | 0.35 | 0.00090 | 0.00017 | 0.80  | 0.204 | 0.0033 |
| J 2    | 0.0021 | 0.0004 | 0.00093 | 0.18 | 0.00077 | 0.00008 | 0.26  | 0.196 | 0.0009 |
| J 3    | 0.0019 | 0.0003 | 0.00074 | 0.20 | 0.00096 | 0.00007 | 1.59  | 0.232 | 0.0069 |
| J 4    | 0.0023 | 0.0003 | 0.00088 | 0.11 | 0.00094 | 0.00003 | 0.12  | 0.204 | 0.0009 |
| KHL2   | 0.0006 | 0.0073 | 0.00040 | 0.20 | 0.00776 | 0.00020 | 17.36 | 0.178 | 0.0036 |
| KHL3   | 0.0007 | 0.0073 | 0.00070 | 0.46 | 0.00690 | 0.00022 | 15.73 | 0.174 | 0.0040 |
| KHL5   | 0.0007 | 0.0073 | 0.00066 | 0.42 | 0.00810 | 0.00022 | 11.19 | 0.174 | 0.0040 |
| KHL6   | 0.0006 | 0.0076 | 0.00088 | 0.79 | 0.00808 | 0.00047 | 21.62 | 0.186 | 0.0038 |
| KHL8   | 0.0007 | 0.0074 | 0.00043 | 0.39 | 0.00478 | 0.00022 | 17.85 | 0.157 | 0.0039 |

**Table S5.** Comparison of normalized concentration of Na, Mn, Ba, Mg, and Sr in marine and freshwater environments (✓ -  $p < 0.01$ , ✓\* -  $p < 0.05$ , × -  $p > 0.05$ ).

| Factor                    | Na | Mn | Ba | Mg | Sr |
|---------------------------|----|----|----|----|----|
| Marine, Ca-normalized     |    |    |    |    |    |
| Locality                  | ✓* | ✓* | ✓  | ✓  | ✓* |
| Species                   | ✓* | ✓  | ✓  | ✓  | ×  |
| Freshwater, Ca-normalized |    |    |    |    |    |
| Locality                  | ✓* | ✓* | ✓  | ×  | ✓  |
| Species                   | ×  | ✓* | ✓  | ×  | ✓* |
| Marine, Al-normalized     |    |    |    |    |    |
| Locality                  | ✓* | ×  | ✓  | ✓* | ✓* |
| Species                   | ✓  | ×  | ✓  | ✓  | ✓  |
| Freshwater, Al-normalized |    |    |    |    |    |
| Locality                  | ×  | ✓  | ×  | ✓* | ×  |
| Species                   | ×  | ✓  | ×  | ✓* | ×  |

**Table S6.** Correlations between Ca-normalized concentrations of Li, Na, S and U in mussels' shells, water, and sediment ( $n = 6$ ). Significant correlations are marked by an asterisk.

| Element in Shell | Element in Water<br>$R_{\text{Spearman}}$ (Probability) | Element in Sediment<br>$R_{\text{Spearman}}$ (Probability) |
|------------------|---------------------------------------------------------|------------------------------------------------------------|
| Li/Ca            | 0.943 ( $p < 0.01$ )*                                   | - 0.086 ( $p > 0.05$ )                                     |
| Na/Ca            | 0.829 ( $p < 0.05$ )*                                   | 0.371 ( $p > 0.05$ )                                       |
| S/Ca             | 0.829 ( $p < 0.01$ )*                                   | - 0.543 ( $p > 0.05$ )                                     |
| U/Ca             | 0.257 ( $p > 0.05$ )                                    | 0.829 ( $p < 0.01$ )*                                      |

**Table S7.** Relationships of Ca-normalized trace element concentrations in mussels' shells with "species" factor, determined using GLM (relationships are significant at  $p < 0.05$ , marked by an asterisk).

| Element | Freshwater Species |                 | Marine Species |                 |
|---------|--------------------|-----------------|----------------|-----------------|
|         | R <sup>2</sup>     | <i>p</i> -Value | R <sup>2</sup> | <i>p</i> -Value |
| Li      | 0.507              | 0.006*          | 0.884          | 0.001*          |
| Na      | 0.292              | 0.050           | 0.301          | 0.025*          |
| Mg      | 0.156              | 0.143           | 0.602          | 0.001*          |
| S       | 0.523              | 0.005*          | 0.372          | 0.012*          |
| La      | 0.295              | 0.049*          | 0.401          | 0.009*          |
| Ce      | 0.285              | 0.053           | 0.546          | 0.002*          |
| Nd      | 0.257              | 0.067           | 0.541          | 0.002*          |
| Pb      | 0.206              | 0.099           | 0.590          | 0.001*          |
| U       | 0.324              | 0.038*          | 0.403          | 0.009*          |

**Table S8.** Relationships of Ca-normalized trace element concentrations in mussels' shells with "locality" factor, determined using GLM (relationships are significant at  $p < 0.01$ ). Statistically significant relationships are marked by an asterisk.

| Element | Factor              |                 |                 |                 |
|---------|---------------------|-----------------|-----------------|-----------------|
|         | Freshwater Locality |                 | Marine Locality |                 |
|         | R <sup>2</sup>      | <i>p</i> -Value | R <sup>2</sup>  | <i>p</i> -Value |
| Li      | 0.652               | 0.001*          | 0.874           | 0.001*          |
| S       | 0.541               | 0.004*          | 0.381           | 0.028           |
| Mn      | 0.327               | 0.037           | 0.306           | 0.054           |
| Cu      | 0.935               | 0.001*          | 0.492           | 0.010           |
| Sr      | 0.962               | 0.001*          | 0.727           | 0.001*          |
| Ba      | 0.590               | 0.002*          | 0.908           | 0.001*          |
| Nd      | 0.357               | 0.028           | 0.620           | 0.002*          |
| Gd      | 0.305               | 0.045           | 0.718           | 0.001*          |
| Pb      | 0.144               | 0.156           | 0.556           | 0.005*          |



**Table S9.** GLM for Al-normalized concentration of trace elements in freshwater mussels' shells, Factor: Locality (relationships are significant at  $p < 0.01$ ).

| Element | R <sup>2</sup> | <i>p</i> -Value |
|---------|----------------|-----------------|
| Li      | 0.696          | < 0.001         |
| S       | 0.503          | < 0.006         |
| Ti      | 0.575          | < 0.002         |
| Mn      | 0.478          | < 0.008         |
| Cu      | 0.732          | < 0.001         |
| Ce      | 0.576          | < 0.002         |
| Nd      | 0.543          | < 0.004         |
| U       | 0.583          | < 0.002         |

**Table S10.** GLM for Al-normalized concentration of trace elements in marine mussels' shells, Factor: Locality (relationships are significant at  $p < 0.01$ ).

| Element | R <sup>2</sup> | <i>p</i> -Value |
|---------|----------------|-----------------|
| Li      | 0.965          | < 0.001         |
| Na      | 0.903          | < 0.001         |
| Mg      | 0.926          | < 0.001         |
| S       | 0.665          | < 0.001         |
| K       | 0.952          | < 0.001         |
| Mn      | 0.511          | < 0.008         |
| Fe      | 0.865          | < 0.001         |
| Cu      | 0.876          | < 0.001         |
| Zn      | 0.948          | < 0.001         |
| Sr      | 0.784          | < 0.001         |
| Ba      | 0.343          | < 0.040         |
| Pr      | 0.977          | < 0.001         |

**Table S11.** Relationships of distribution coefficients ( $K_d$  Shell/Water) of elements between mussels' shells and water with factor "locality" determined using GLM (relationships are significant at  $p < 0.01$ ).

| Distribution Coefficient | R <sup>2</sup> | p-Value |
|--------------------------|----------------|---------|
| $K_d$ Li                 | 0.551          | 0.001   |
| $K_d$ S                  | 0.894          | 0.001   |
| $K_d$ Mn                 | 0.910          | 0.001   |
| $K_d$ Sr                 | 0.616          | 0.001   |

**Table S12.** Relationships of element distribution coefficients ( $K_d$  Shell/Water) with species factor determined using GLM (relationships are significant at  $p < 0.01$ ).

| Distribution Coefficient | R <sup>2</sup> | p-Value |
|--------------------------|----------------|---------|
| $K_d$ Na                 | 0.937          | 0.001   |
| $K_d$ Mg                 | 0.321          | 0.009   |
| $K_d$ Al                 | 0.252          | 0.026   |
| $K_d$ S                  | 0.895          | 0.001   |
| $K_d$ Mn                 | 0.827          | 0.001   |
| $K_d$ U                  | 0.243          | 0.029   |

**Table S13.** Spearman correlation coefficients between content of calcite, aragonite, vaterite and Ca-normalized element concentrations in bivalve shells. One asterisk indicates a significant correlation at  $p < 0.05$ , two asterisks indicate a significant correlation at  $p < 0.01$ . A dash indicates no statistically significant correlation.

| Mineral   | Mg     | Sr      | Mn     | Fe      | Na      | Zn     | Ba      | Ce    | Pr    | Nd    | Gd    | Pb    |
|-----------|--------|---------|--------|---------|---------|--------|---------|-------|-------|-------|-------|-------|
| Calcite   | 0.73** | 0.74**  | 0.84** | -0.73** | 0.80**  | 0.62** | -0.79** | -     | -     | 0.46* | -     | -     |
| Aragonite | 0.76** | -0.76** | 0.77** | 0.69**  | -0.83** | 0.53** | 0.75**  | -     | -     | 0.45* | 0.59* | 0.57* |
| Vaterite  | 0.71** | -0.70** | 0.76** | 0.75**  | -0.68** | 0.76** | 0.81**  | 0.43* | 0.38* | 0.58* | 0.54* | 0.54* |

**Table S14.** Spearman correlation coefficients between content of calcite, aragonite, vaterite and Al-normalized element concentrations. One asterisk indicates a significant correlation at  $p < 0.05$ , two asterisks indicate a significant correlation at  $p < 0.01$ . A dash indicates no statistically significant correlation.

| Mineral   | Mg      | Sr      | Fe     | Na      | Zn      | Ba      | La      | Ce     | Pr          | Nd          | Gd              | Pb              |
|-----------|---------|---------|--------|---------|---------|---------|---------|--------|-------------|-------------|-----------------|-----------------|
| Calcite   | 0.82**  | 0.81**  | 0.40*  | 0.79**  | 0.79**  | 0.58**  | 0.75**  | 0.38*  | 0.59**      | 0.55**      | 0.65*<br>*      | 0.73*<br>*      |
| Aragonite | -0.81** | -0.80** | -0.43* | -0.80** | -0.75** | -0.58** | -0.78** | -0.43* | -<br>0.61** | -<br>0.59** | -<br>0.72*<br>* | -<br>0.71*<br>* |
| Vaterite  | -0.84** | -0.79** | -      | -0.82** | -0.85** | -0.55** | -0.64** | -      | -0.46       | -0.44*      | -<br>0.58*<br>* | -<br>0.70*<br>* |

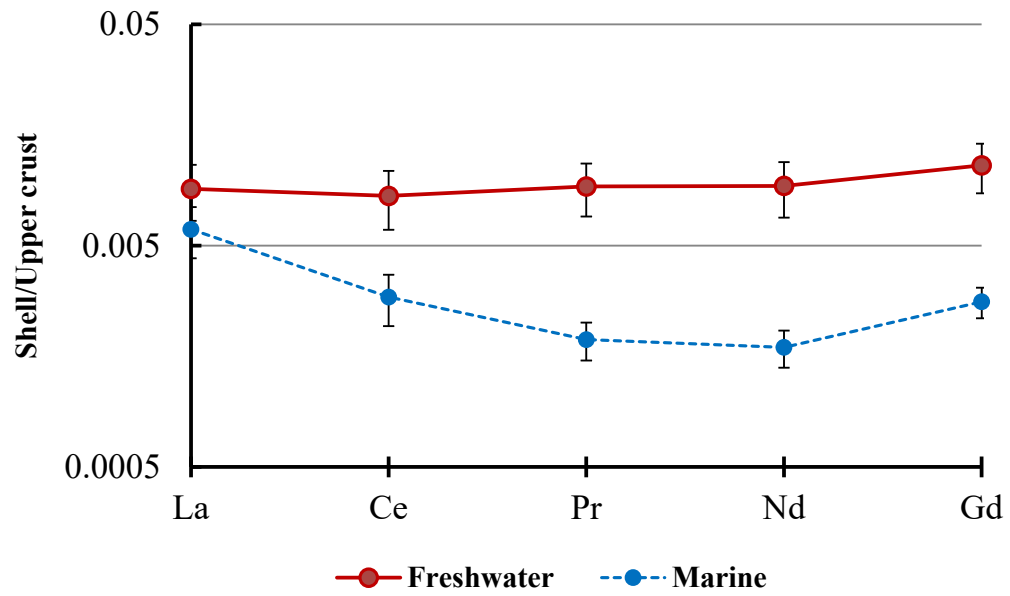

**Figure S1.** Upper crust-normalized REE pattern of the average values in the bivalve mollusks' shells.

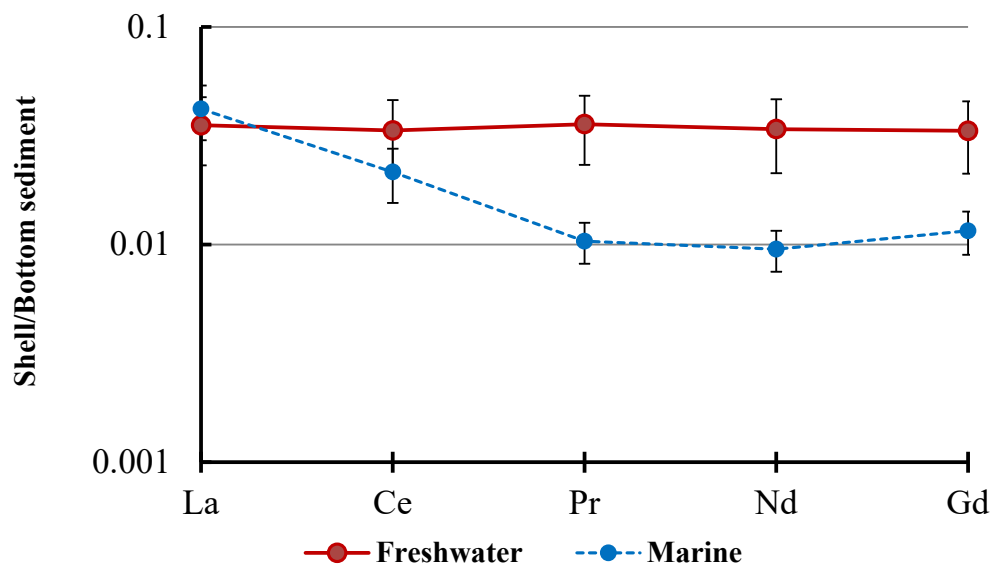

**Figure S2.** Bottom sediment-normalized REE pattern of the average values in the bivalve mollusks' shells.

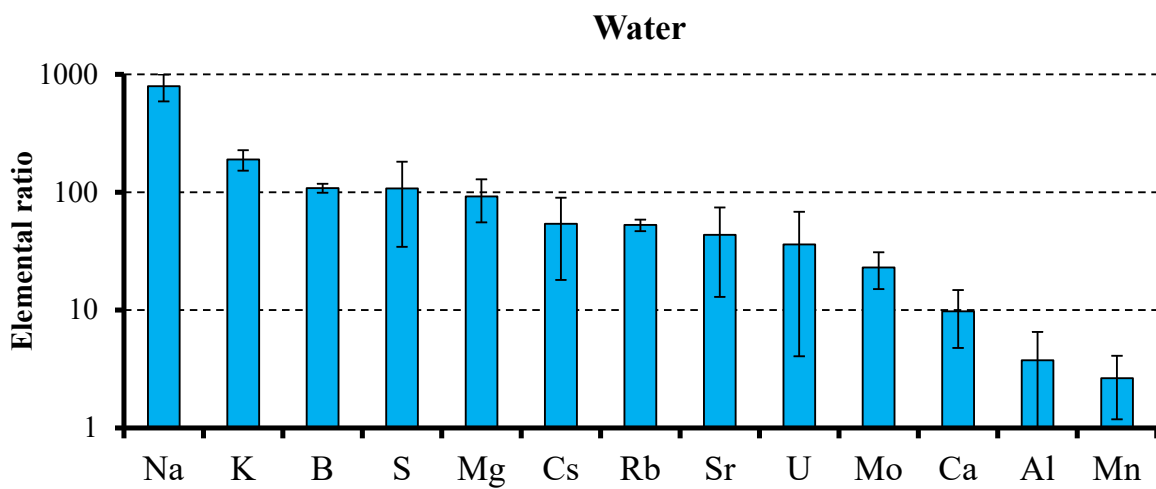

**Figure S3.** Mean ratio of trace elements concentrations in marine to fresh water localities. Error bars indicate s.e.m.

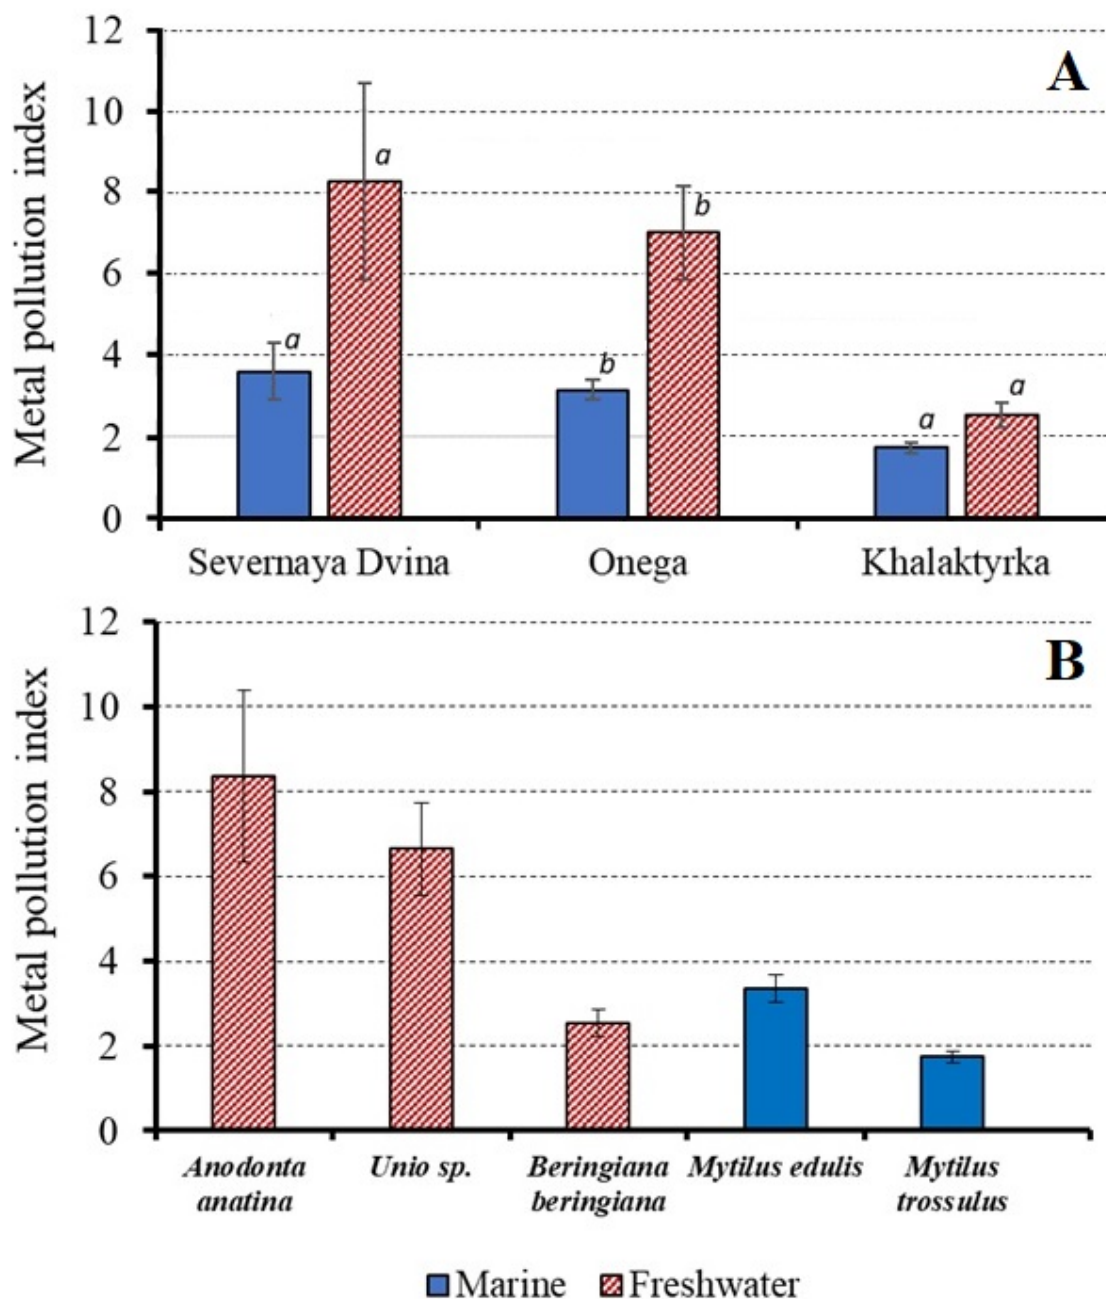

**Figure S4.** (A) - Mean values of the metal (Li, Na, Mg, Al, P, K, Ti, Mn, Fe, Cu, Zn, Sr, Zr, Ba, La, Ce, Pr, Nd, Gd, Pb, and U) pollution index for studied samples of marine ( $n = 4-5$ ) and freshwater mussels ( $n = 4-6$ ). Significant differences are shown by letters ( $a$  – no significant differences ( $p > 0.05$ ),  $b$  – differences are significant at  $p < 0.05$ ); (B) - Mean values of the metal (Li, Na, Mg, Al, P, K, Ti, Mn, Fe, Cu, Zn, Sr, Zr, Ba, La, Ce, Pr, Nd, Gd, Pb, and U) pollution index for studied species of marine ( $n = 5-9$ ) and freshwater mussels ( $n = 5$ ).

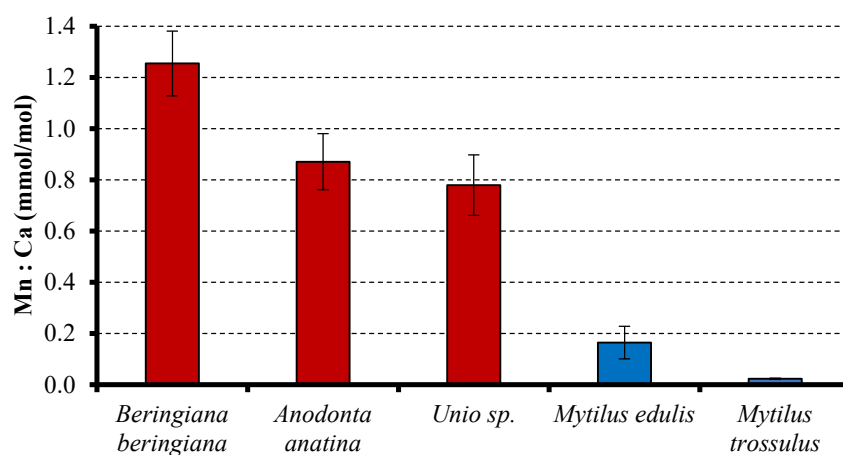

**Figure S5.** Comparison of Mn : Ca-ratio (mmol/mol) in shells of studied species of bivalve mollusks ( $n = 5$  to 9). The differences between Mn : Ca-ratio values among samples are significant at  $p < 0.00001$ . Error bars indicate s.e.m.

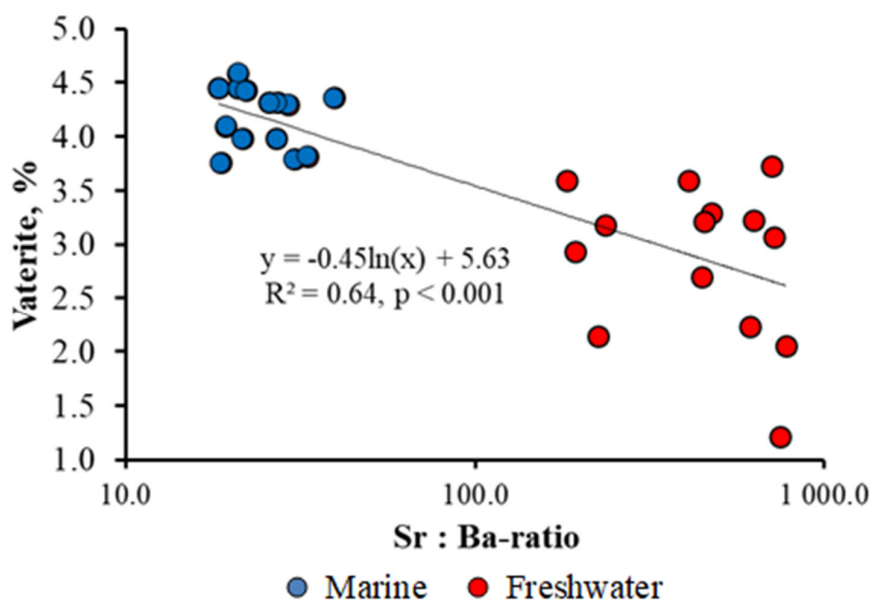

**Figure S6.** Regression relationship between Sr : Ba – ratio in freshwater (red circles) and marine (blue circles) mussels' shells and percentage of vaterite.

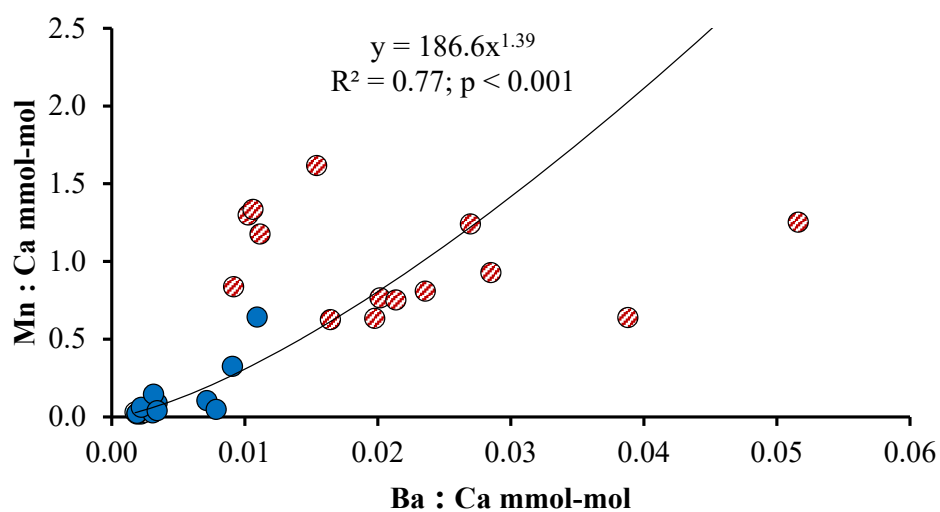

**Figure S7.** Regression relationships between Ba : Ca-ratio and Mn : Ca-ratio in bivalve shells samples. Blue circles, marine mussels (N = 15); hatched circles, freshwater mussels (N = 14).

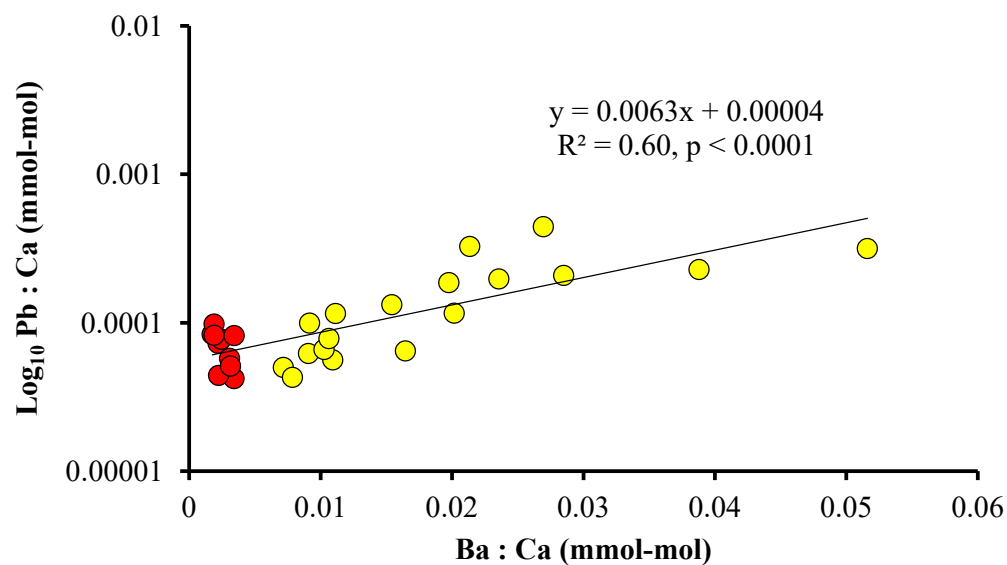

**Figure S8.** The power relationships between Ba : Ca-ratio and Pb : Ca-ratio in bivalve shells samples. Yellow labels show samples from biotopes with silt sediment and red labels show samples from biotopes with dominant sandy deposits.

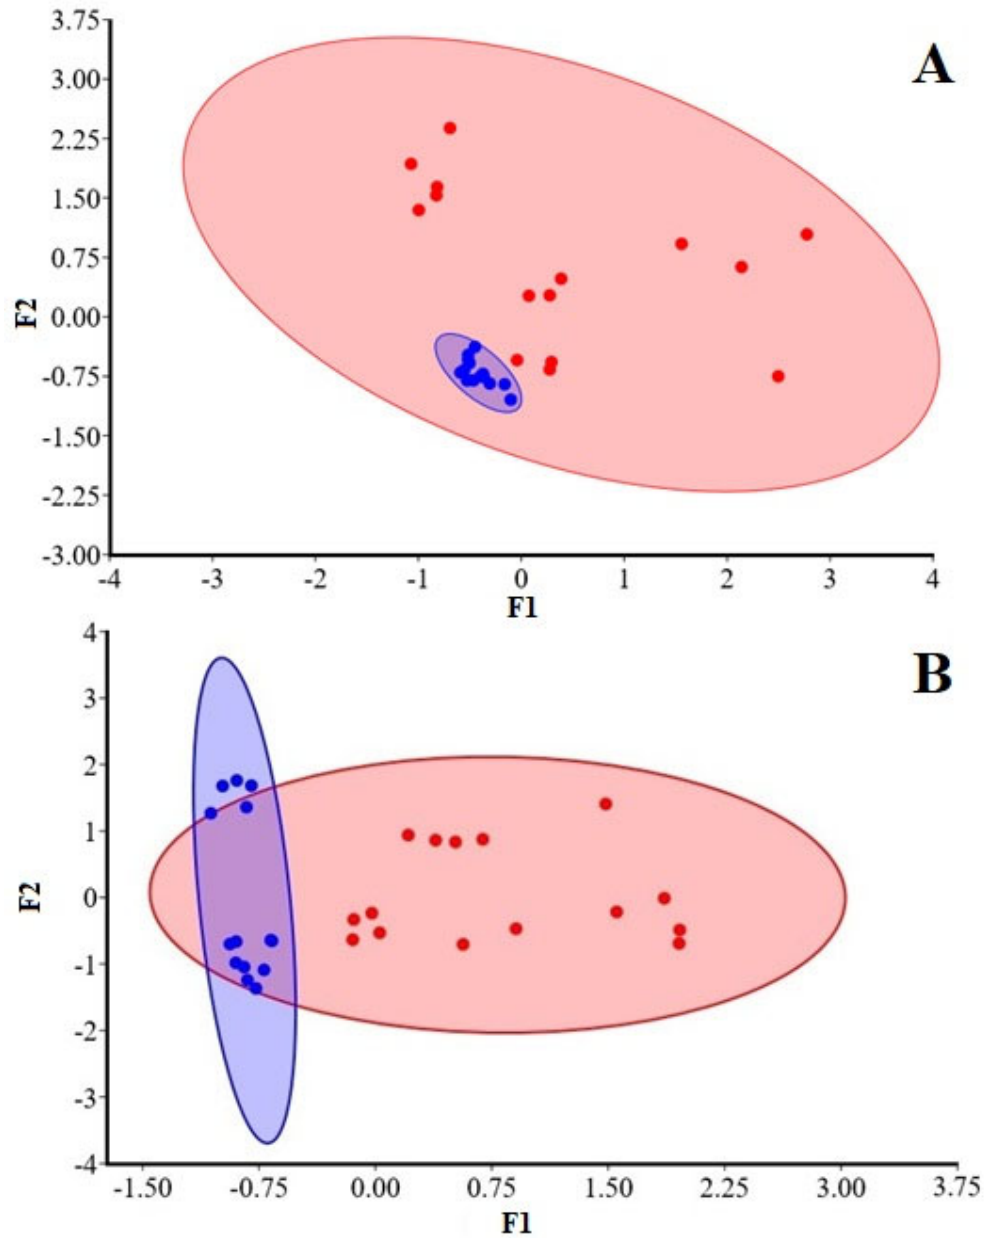

**Figure S9.** (A) - PCA factorial graph F1 × F2 for  $K_d$  Shell/Water. The samples are shown by markers: blue ones present marine samples; red ones present freshwater samples. Ellipses indicate 95 % confidence interval. (B) - PCA factorial graph F1 × F2 for  $K_d$  Shell/Sediment. The samples are shown by markers: blue ones present marine samples; red ones present freshwater samples. Ellipses indicate 95 % confidence interval.



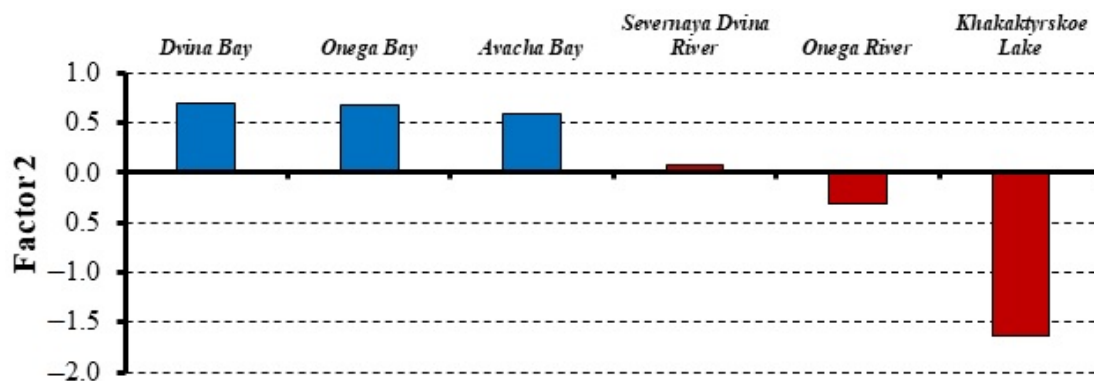

**Figure S10.** Median values of Factor 2 for studied samples of mussels from marine (blue columns) and freshwater (red columns) localities.

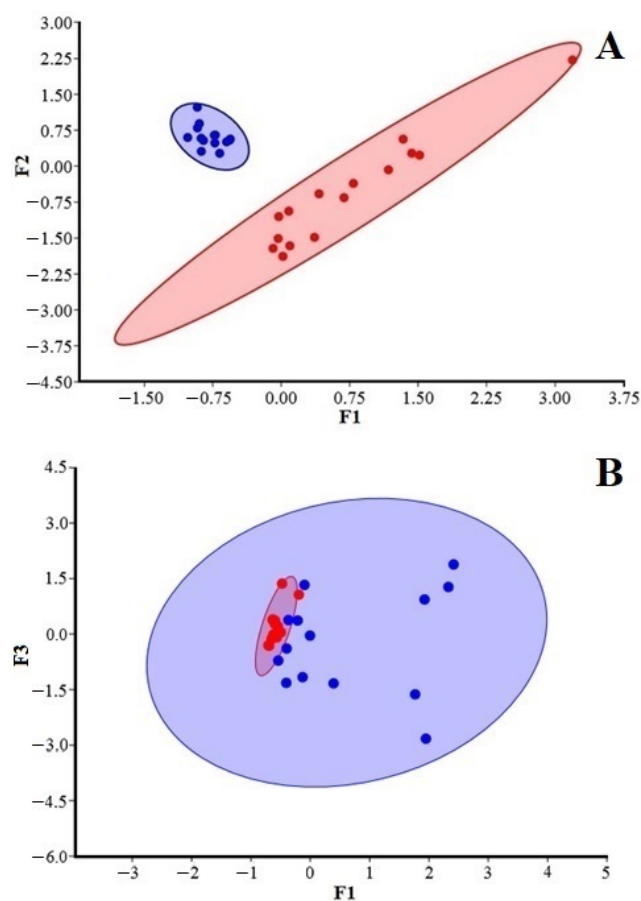

**Figure S11.** (A) Normed PCA factorial graph  $F1 \times F2$  of marine (blue circles) and freshwater (red circles) samples. Ellipses indicate 95 % confidence interval; (B) PCA factorial graph  $F1 \times F3$  of AI-normalized concentration of trace elements in freshwater and marine samples. The samples are shown by markers: blue ones present marine samples; red ones present freshwater samples. Ellipses indicate 95 % confidence interval.
